# Supplementary material for: Thiazole orange-conjugated peptide nucleic acid for fluorescent detection of specific DNA sequences and site-selective photodamage
Source: Royal Society of Chemistry journal article supplement (doi:10.1039/c4ra13780a), 2014-01-01
Supplement: c4ra13780a1.pdf [file c4ra13780a1.pdf]

*Supporting Information*

**Thiazole orange-conjugated peptide nucleic acid for  
fluorescent detection of specific DNA sequence and  
site-selective photodamage**

Makiko Tanaka, Narumi Shigi, Jun Sumaoka,<sup>†</sup> and Makoto Komiyama\*

*Life Science Center of Tsukuba Advanced Research Alliance, University of Tsukuba,  
1-1-1 Tennoudai, Tsukuba, Ibaraki, 305-8577 Japan*

*<sup>†</sup>School of Media Science, Tokyo University of Technology, 1404-1 Katakuramachi,  
Hachioji City, Tokyo 192-0983, Japan (current address)*

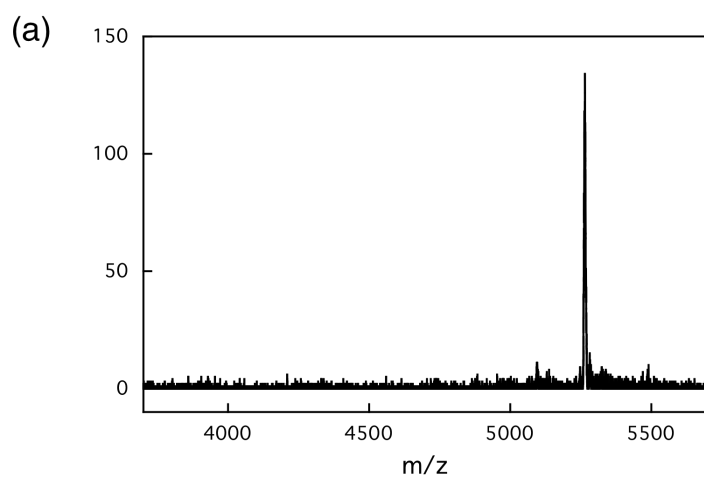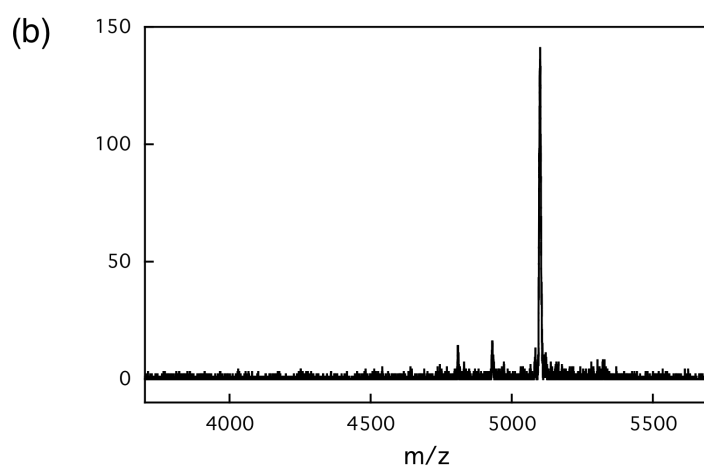

**Fig. S1** Mass spectra of TO-modified pcPNAs. (a) TO-pcPNA1;  $m/z = 5264.6$  (calculated  $[M-3H]^+$ : 5264.5) and (b) TO-pcPNA2;  $m/z = 5100.8$  (calculated  $[M-3H]^+$ : 5101.4).

(a)

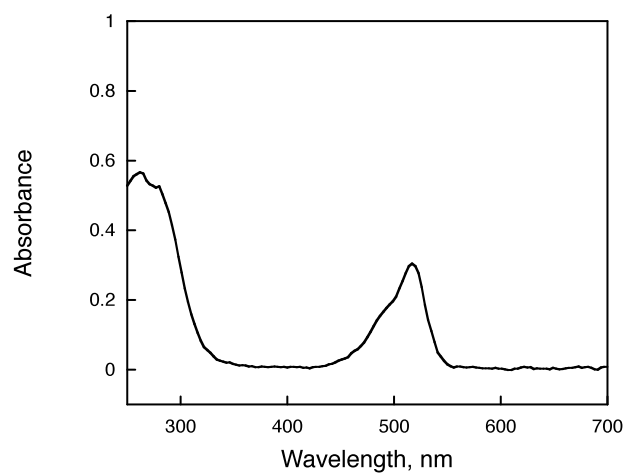

(b)

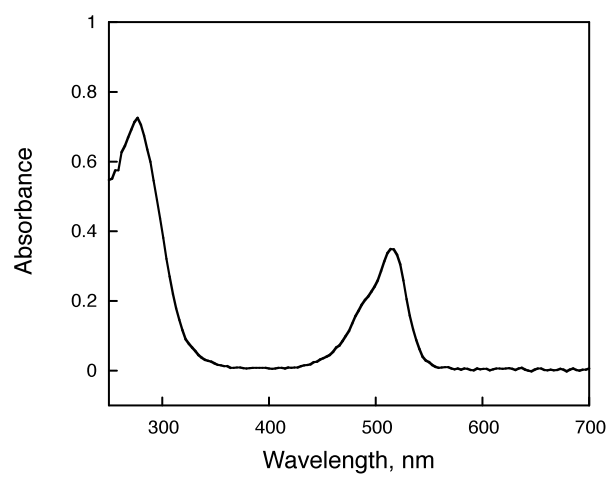

**Fig. S2** Absorption spectra of (a) TO-pcPNA1 and (b) TO-pcPNA2. These spectra were obtained using a NanoDrop 1000 (Thermo Fisher Scientific).

**Gel-Shift assay to assess the conditions for the formation and the decomposition of invasion complex of TO-conjugated pcPNA.**

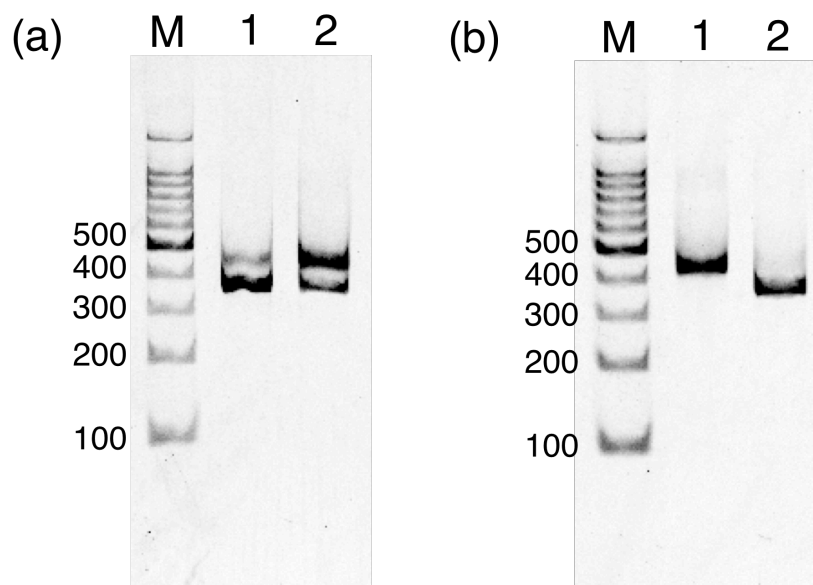

**Fig. S3** (a) Assay of invasion complex formation of TO-pcPNA1/TO-pcPNA2 to dsDNA (381 bp) at [each TO-conjugated pcPNA] = 10 nM (lane 1) and 25 nM (lane 2). Lane M, 100 bp ladder marker. Invasion conditions: [381 bp DNA] = 5.0 nM, [HEPES (pH 7.0)] = 5.0 mM and [NaCl] = 20 mM at 50°C overnight. (b) Evaluation of the conditions for the removal of TO-conjugated pcPNAs from dsDNA (381 bp). The invasion complex was first prepared with [each TO-conjugated pcPNA] = 50 nM in lane 1. Then, it was incubated at 50°C for 3 h in the presence of 0.5 M NaCl (lane 2). The gel-shift assay was carried out using 5% nondenaturing PAGE. The bands were stained with GelStar and quantified with Typhoon FLA 7000 imaging analyzer.

## Sequence of pBFP-N1 and the scission sites of various enzymes

Recognition sites of the restriction enzymes are highlighted in yellow.

The sequence of 381 bp DNA coding a part of BFP is shown as blue characters.

TAGTTATTAATAGTAATCAATTACGGGGTCATTAGTTCATAGCCCATATATGGAGTTCCGCG  
TTACATAACTTACGGTAAATGGCCCGCTGGCTGACCGCCAACGACCCCGCCATTGACG  
TCAATAATGACGTATGTTCCCATAGTAACGCCAATAGGGACTTTCATTGACGTCAATGGGT  
GGAGTATTTACGGTAAACTGCCCACTTGGCAGTACATCAAGTGTATCATATGCCAAGTACGC  
CCCCTATTGACGTCAATGACGGTAAATGGCCCGCTGGCATTATGCCAGTACATGACCTTA  
TGGGACTTTCCTACTTGGCAGTACATCTACGTATTAGTCATCGCTATTACCATGGTGATGCGG  
TTTTGGCAGTACATCAATGGGCGTGGATAGCGGTTTGACTCACGGGGATTTCCAAGTCTCCA  
CCCCATTGACGTCAATGGGAGTTTGTGGTGGCACCACCAAAATCAACGGGACTTTCCAAAATGTC  
GTAACAACCTCCGCCCCATTGACGCAAATGGGCGGTAGGCGTGTACGGTGGGAGGTCTATAT  
AAGCAGAGCTGGTTAGTGAACCGTCAGATCCGCTAGCGCT(HaeII)ACCGGACTCAGATCTC  
GAGCTCAAGCTTCGAATTCTGCAGTTCGACGGTACCGCGGGCCC(ApaI)GGGATCCACGGTCC  
CCACCATGGTGAGCAAGGGCGAGGAGCTGTTACCGGGTGGTGCCCATCCTGGTTCGAGCT  
GGACGGCGACGTAAACGGCCACAAGTTCAGCGTGTCCGGCGAGGGCGAGGGCGATGCCACC  
TACGGCAAGCTGACCCTGAAGTTCATCTGCACCACCGGCAAGCTGCCCGTGCCCTGGCCAC  
CCTCGTACTACTCTTAGTCATGGTGTACAGTGCTTCAGCCGCTACCCCGACCACATGAAGC  
GCC(HaeII)ACGACTTCTCAAGTCCGCCATGCCCGAAGGCTACGTCCAGGAGCGCACCATCTT  
CTTCAAGGACGACGGCAACTACAAGACCCGCGCCGAGGTGAAGTTCGAGGGCGACACCCTG  
GTGAACCGCATCGAGCTGAAGGGCATCGACTTCAAGGAGGACGGCAACATCCTGGGGCACA  
AGCTGGAGTACAAC TACAACAGCCACAACGTCTATATCATGGCCGACAAGCAGAAGAACGG  
CATCAAGGTGAAC TCAAGACCCGCCACAACATCGAGGACGGCAGCGTGCAGCTCGCCGAC  
CACTACCAGCAGAACACCCCATCGGCGACGGCCCCGTGCTGCTGCCCGACAACCACTACCT  
GAGCACCCAGTCCGCCCTGAGCAAAGACCCCAACGAGAAGCGCGATCACATGGTCTCTGCTG  
GAGTTCGTGACCCGCCCGGGATCACTCACGGCATGGACGAGCTGTACAAGTAAAGCGGCC  
GCGACTCTAGATCATAATCAGCCATAACCACATTTGTAGAGGTTTTACTTGTCTTTAAA(DraI)AA  
ACCTCCCACACCTCCCCCTGAACCTGAAACATAAAATGAATGCAATTGTTGTTGTTAACTTG  
TTTATTGCAGCTTATAATGGTTACAAATAAAGCAATAGCATCACAAATTTACAAATAAAGC  
ATTTTTTCACTGCATTCTAGTTGTGGTTTGTCCAACTCATCAATGTATCTTAAGGCGTAAA  
TTGTAAGCGTTAATATTTTGTAAATTCGCGTTAAATTTTTGTTAAATCAGCTCATTTTTTAA  
CCAATAGGCCGAAATCGGCAAAATCCCTTATAAATCAAAAAGAAATAGACCGAGATAGGGTTG  
AGTGTGTTCCAGTTTGGAAACAAGAGTCCACTATTAAGAAGCTGGACTCCAACGTCAAAGG  
GCGAAAAACCGTCTATCAGGGCGATGGCCACTACGTGAACCATCACCTAATCAAGTTTTT  
TGGGGTCGAGGTGCCGTAAAGCACTAAATCGGAACCCTAAAGGGAGCCCCGATTTAGAGC  
TTGACGGGAAAGCCGGCGAACGTGGCGAGAAAGGAAGGAAGAAAGCGAAAGGAGCGG  
GCGCT(HaeII)AGGGCGCT(HaeII)GGCAAGTGTAGCGGTACGCTGCGCGTAACCACCACACC  
GCCGCGCTTAATGCGCCGCTACAGGGCGCGTCAGGTGGCACTTTTCGGGGAAATGTGCGCG  
GAACCCCTATTTGTTTATTTTCTAAATACATTCAAATATGTATCCGCTCATGAGACAATAAC  
CCTGATAAATGCTTCAATAATATTGAAAAAGGAAGAGTCTGAGGGCGGAAAGAAC CAGCTG  
(PvuII)TGGAATGTGTGTCAGTTAGGGTGTGGAAAGTCCCCAGGCTCCCCAGCAGGCAGAAGT  
ATGCAAAGCATGCATCTCAATTAGTCAGCAACCAGGTGTGGAAAGTCCCCAGGCTCCCCAG  
CAGGCAGAAGTATGCAAAGCATGCATCTCAATTAGTCAGCAACCATAGTCCC GCCCTAACT  
CCGCCCATCCCGCCCCTA ACTCCGCCAGTTCGCCCATTTCTCCGCCCATGGCTGACTAATT  
TTTTTTATTTATGCAGAGGCCGAGGCCGCTCGGCCTCTGAGCTATTCCAGAAGTAGTGAGG

AGGCTTTTTTGGAGGCCT(StuI)AGGCTTTTGC AAAGATCGATCAAGAGACAGGATGAGGATC  
GTTTCGCATGATTGAACAAGATGGATTGCACGCAGGTTCTCCGGCCGCTTGGGTGGAGAGGC  
TATTCGGCTATGACTGGGCACAACAGACAATCGGCTGCTCTGATGCCGCCGTGTTCCGGCTG  
TCAGCGCAGGGGCGCC(HaeII)CGGTTCTTTTTGTCAAGACCGACCTGTCCGGTGCCCTGAATG  
AACTGCAAGACGAGGCAGCGCGGCTATCGTGGCTGGCCACGACGGGCGTTCCTTGCGCAGC  
TG(PvuII)TGCTCGACGTTGTCACTGAAGCGGGAAGGGACTGGCTGCTATTGGGCGAAGTGCC  
GGGGCAGGATCTCCTGTCATCTCACCTTGCTCCTGCCGAGAAAGTATCCATCATGGCTGATG  
CAATGCGGCGGCTGCATACGCTTGATCCGGCTACCTGCCATTGACCACCAAGCGAAACAT  
CGCATCGAGCGAGCACGTA CTCCGGATGGAAGCCGGTCTTGTCGATCAGGATGATCTGGACG  
AAGAGCATCAGGGGCTCGCGCCAGCCGA ACTGTTCCGCCAGGCTCAAGGCGAGCATGCCCGA  
CGGCGAGGATCTCGTCGTGACCCATGGCGATGCCTGCTTGCCGAATATCATGGTGGAAAATG  
GCCGCTTTTTCTGGATTCACTGACTGTGGCCGGCTGGGTGTGGCGGACCGCTATCAGGACATA  
GCGTTGGCTACCCGTGATATTGCTGAAGAGCTTGGCGGCGAATGGGCTGACCCTTCCTCGT  
GCTTTACGGTATCGCCGCTCCCGATTGCGAGCGCATCGCCTTCTATCGCCTTCTTGACGAGTT  
CTTCTGAGCGGGACTCTGGGGTTCGAAATGACCGACCAAGCGACGCCAACCTGCCATCAC  
GAGATTTGATTCCACCGCCGCTTCTATGAAAGGTTGGGCTTCGGAATCGTTTTCCGGGAC  
GCCGGCTGGATGATCCTCCAGCGCGGGGATCTCATGCTGGAGTTCTTCGCCACCCTAGGGG  
GAGGCTAACTGAAACACGGAAGGAGACAATACCGGAAGGAACCCGCGCTATGACGGCAAT  
AAAAAGACAGAATAAAACGCACGGTGTGGGTCGTTTGTTCATAAACCGGGGTTCCGGTCC  
CAGGGCTGGCACTCTGTGATACCCACCGAGACCCATTGGGGCCAATACGCCCGGCTTTC  
TTCTTTTTCCCCACCCCAAGTTCGGGTGAAGGCCAGGGCTCGCAGCCAACGCTCG  
GGGCGCAGGCCCTGCCATAGCCTCAGGTTACTCATATATACTTTAGATTGATTTTAAA(DraI  
)CTTCATTTTTTAA TTTAAA(DraI)AGGATCTAGGTGAAGATCCTTTTTGATAATCTCATGACCAA  
AATCCCTTAACGTGAGTTTTCGTTCCACTGAGCGTCAGACCCCGTAGAAAAGATCAAAGGAT  
CTTCTGAGATCCTTTTTTTCTGCGCGTAATCTGCTGCTTGCAAACAAAAAACCACCGCTAC  
CAGCGGTGGTTTTGTTTCCGGATCAAGAGCTACCAACTCTTTTTCCGAAGGTA ACTGGCTTC  
AGCAGAGCGCAGATACCAAATACTGTCCTTCTAGTGTAGCCGTAGTTAGGCCACC ACTTCAA  
GAACTCTGTAGCACCGCCTACATACTCCTGCTGCTAATCCTGTTACCAGTGGCTGCTGCCA  
GTGGCGATAAGTCGTGTCTTACCGGGTTGGACTCAAGACGATAGTTACCGGATAAGGCGCA  
GCGGTCCGGCTGAACGGGGGTTTCGTGCACACAGCCAGCTTGAGCGAACGACCTACACC  
GAACTGAGATACCTACAGCGTGAGCTATGAGAAAGCGCC(HaeII)ACGCTTCCCGAAGGGAGA  
AAGGCGGACAGGTATCCGGTAAGCGGCAGGGTCGGAACAGGAGAGCGCACGAGGGAGCTT  
CCAGGGGGAACGCCTGGTATCTTTATAGTCCTGTCCGGTTTTCGCCACCTCTGACTTGAGCG  
TCGATTTTTGTGATGCTCGTCAGGGGGCGGAGCCTATGGAAAACGCCAGCAACGCGGCC  
TTTTTACGGTTCCTGGCCTTTTGCTGGCCTTTTGCTCACATGTTCTTTCCTGCGTTATCCCTG  
ATTCTGTGGATAACCGTATTACCGCCATGCAT
